# Supplementary material for: Differences in Fat-Free Mass According to Serum Vitamin D Level and Calcium Intake: Korea National Health and Nutrition Examination Survey 2008–2011
Source: MDPI journal article supplement (doi:10.3390/jcm10225428), 2021-11-20
Supplement: s1 [file s1]

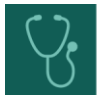

**Table S1.** Linear regression analysis of changes in whole body total fat-free mass by group (serum vitamin D level cutoff: 10 ng/mL, recommended daily calcium intake: 700 mg)

| Characteristics                             | Men                      | Women                   |
|---------------------------------------------|--------------------------|-------------------------|
| Age, years                                  | -0.11 (-0.12, -0.093)    | -0.032 (-0.043, -0.022) |
| Group                                       |                          |                         |
| 1 (n = 178/709)                             |                          |                         |
| 2 (n = 4,179/6,614)                         | 2.18 (1.34, 3.02)        | 0.71 (0.17, 1.26)       |
| 3 (n = 67/93)                               | 2.54 (0.88, 4.19)        | 0.78 (-0.56, 2.12)      |
| 4 (n = 1,432/1,172)                         | 3.00 (2.10, 3.90)        | 0.98 (0.36, 1.60)       |
| Body mass index, kg/m <sup>2</sup>          |                          |                         |
| < 25                                        |                          |                         |
| ≥ 25                                        | 6.82 (6.45, 7.19)        | 5.14 (4.85, 5.43)       |
| Nutritional intake                          |                          |                         |
| Total energy intake, kcal/day               | 0.001 (0.001, 0.002)     | 0.0009 (0.0007, 0.001)  |
| Water intake/body weight, g/kg/day          | -0.12 (-0.14, -0.10)     | -0.072 (-0.088, -0.056) |
| Smoking                                     |                          |                         |
| None                                        |                          |                         |
| Past                                        | 0.42 (-0.075, 0.92)      | 0.57 (-0.14, 1.28)      |
| Current                                     | 0.29 (-0.16, 0.73)       | -0.34 (-0.82, 0.15)     |
| Alcohol drinking                            |                          |                         |
| <1 time/month                               |                          |                         |
| ≥1 time/month                               | 0.40 (0.029, 0.78)       | 0.40 (0.19, 0.61)       |
| Physical activity, MET-min/week             | 0.0001 (0.00007, 0.0002) | 0.0002 (0.0001, 0.0002) |
| Education                                   |                          |                         |
| ≤Elementary school                          |                          |                         |
| Middle school                               | 1.00 (0.36, 1.64)        | 0.94 (0.54, 1.35)       |
| High school                                 | 1.41 (0.84, 1.99)        | 1.29 (0.89, 1.70)       |
| ≥College                                    | 1.60 (1.00, 2.19)        | 1.05 (0.60, 1.50)       |
| Average monthly household income, 10000 KRW | 0.002 (0.001, 0.003)     | 0.0005 (0.00005, 0.001) |
| Occupation                                  |                          |                         |
| No                                          |                          |                         |
| Yes                                         | 0.51 (0.11, 0.92)        | 0.10 (-0.12, 0.32)      |
| Survey year                                 |                          |                         |
| 2008                                        |                          |                         |
| 2009                                        | -0.63 (-1.19, -0.076)    | -0.023 (-0.38, 0.338)   |
| 2010                                        | -1.41 (-2.02, -0.80)     | -0.83 (-1.25, -0.42)    |
| 2011                                        | -0.19 (-0.96, 0.57)      | -0.13 (-0.60, 0.34)     |

MET, Metabolic Equivalent Task; KRW, Korea Republic Won

Data are presented as beta coefficient (95% confidence interval).

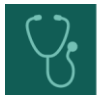

---

Group 1: 25-hydroxy vitamin D < 10 ng/mL and calcium intake < 700 mg

Group 2: 25-hydroxy vitamin D  $\geq$  10 ng/mL and calcium intake < 700 mg

Group 3: 25-hydroxy vitamin D < 10 ng/mL and calcium intake  $\geq$  700 mg

Group 4: 25-hydroxy vitamin D  $\geq$  10 ng/mL and calcium intake  $\geq$  700 mg

<sup>a</sup>Multivariable model adjusted for age, body mass index status, total energy intake, water intake per body weight, smoking, alcohol drinking, physical activity, education, income, occupation, and survey year.

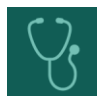

**Table S2.** Linear regression analysis of changes in whole body total fat-free mass by group (serum vitamin D level cutoff: 30 ng/mL, recommended daily calcium intake: 700 mg)

| Characteristics                             | Men                      | Women                   |
|---------------------------------------------|--------------------------|-------------------------|
| Age, years                                  | -0.11 (-0.12, -0.092)    | -0.032 (-0.042, -0.021) |
| Group                                       |                          |                         |
| 1 (n = 3,915/6,940)                         |                          |                         |
| 2 (n = 442/383)                             | 0.19 (-0.42, 0.80)       | 0.12 (-0.38, 0.62)      |
| 3 (n = 1,359/1,210)                         | 0.81 (0.38, 1.23)        | 0.27 (-0.06, 0.60)      |
| 4 (n = 140/55)                              | 2.08 (0.98, 3.18)        | 1.63 (0.47, 2.78)       |
| Body mass index, kg/m <sup>2</sup>          |                          |                         |
| < 25                                        |                          |                         |
| ≥ 25                                        | 6.84 (6.47, 7.21)        | 5.15 (4.87, 5.44)       |
| Nutritional intake                          |                          |                         |
| Total energy intake, kcal/day               | 0.001 (0.001, 0.002)     | 0.0009 (0.0007, 0.001)  |
| Water intake/body weight, g/kg/day          | -0.12 (-0.14, -0.10)     | -0.072 (-0.088, -0.055) |
| Smoking                                     |                          |                         |
| None                                        |                          |                         |
| Past                                        | 0.42 (-0.080, 0.92)      | 0.57 (-0.13, 1.28)      |
| Current                                     | 0.24 (-0.20, 0.68)       | -0.36 (-0.84, 0.13)     |
| Alcohol drinking                            |                          |                         |
| <1 time/month                               |                          |                         |
| ≥1 time/month                               | 0.43 (0.046, 0.81)       | 0.42 (0.21, 0.64)       |
| Physical activity, MET-min/week             | 0.0001 (0.00007, 0.0002) | 0.0002 (0.0001, 0.0002) |
| Education                                   |                          |                         |
| ≤Elementary school                          |                          |                         |
| Middle school                               | 1.02 (0.38, 1.66)        | 0.94 (0.53, 1.34)       |
| High school                                 | 1.42 (0.84, 2.01)        | 1.29 (0.88, 1.69)       |
| ≥College                                    | 1.61 (1.01, 2.21)        | 1.04 (0.59, 1.49)       |
| Average monthly household income, 10000 KRW | 0.002 (0.001, 0.003)     | 0.0005 (0.00005, 0.001) |
| Occupation                                  |                          |                         |
| No                                          |                          |                         |
| Yes                                         | 0.58 (0.18, 0.98)        | 0.10 (-0.12, 0.32)      |
| Survey year                                 |                          |                         |
| 2008                                        |                          |                         |
| 2009                                        | -0.63 (-1.18, -0.073)    | -0.039 (-0.41, 0.329)   |
| 2010                                        | -1.44 (-2.04, -0.83)     | -0.86 (-1.27, -0.45)    |
| 2011                                        | -0.24 (-1.01, 0.53)      | -0.18 (-0.64, 0.29)     |

MET, Metabolic Equivalent Task; KRW, Korea Republic Won

Data are presented as beta coefficient (95% confidence interval).



---

Group 1: 25-hydroxy vitamin D < 30 ng/mL and calcium intake < 700 mg

Group 2: 25-hydroxy vitamin D  $\geq$  30 ng/mL and calcium intake < 700 mg

Group 3: 25-hydroxy vitamin D < 30 ng/mL and calcium intake  $\geq$  700 mg

Group 4: 25-hydroxy vitamin D  $\geq$  30 ng/mL and calcium intake  $\geq$  700 mg

<sup>a</sup>Multivariable model adjusted for age, body mass index status, total energy intake, water intake per body weight, smoking, alcohol drinking, physical activity, education, income, occupation, and survey year.



**Table S3.** Linear regression analysis of changes in whole body total fat-free mass by group (serum vitamin D level cutoff: 10 ng/mL, recommended daily calcium intake: 800 mg)

| Characteristics                             | Men                      | Women                   |
|---------------------------------------------|--------------------------|-------------------------|
| Age, years                                  | -0.11 (-0.12, -0.092)    | -0.033 (-0.043, -0.022) |
| Group                                       |                          |                         |
| 1 (n = 208/741)                             |                          |                         |
| 2 (n = 4,594/7,003)                         | 1.73 (0.91, 2.54)        | 0.68 (0.15, 1.22)       |
| 3 (n = 37/61)                               | 1.51 (-0.44, 3.46)       | 0.75 (-0.77, 2.27)      |
| 4 (n = 1,017/783)                           | 2.51 (1.59, 3.43)        | 1.12 (0.48, 1.75)       |
| Body mass index, kg/m <sup>2</sup>          |                          |                         |
| < 25                                        |                          |                         |
| ≥ 25                                        | 6.82 (6.45, 7.19)        | 5.14 (4.85, 5.43)       |
| Nutritional intake                          |                          |                         |
| Total energy intake, kcal/day               | 0.002 (0.001, 0.002)     | 0.0009 (0.0007, 0.001)  |
| Water intake/body weight, g/kg/day          | -0.12 (-0.14, -0.09)     | -0.073 (-0.089, -0.056) |
| Smoking                                     |                          |                         |
| None                                        |                          |                         |
| Past                                        | 0.41 (-0.088, 0.91)      | 0.57 (-0.14, 1.27)      |
| Current                                     | 0.29 (-0.15, 0.73)       | -0.35 (-0.83, 0.14)     |
| Alcohol drinking                            |                          |                         |
| <1 time/month                               |                          |                         |
| ≥1 time/month                               | 0.39 (0.016, 0.76)       | 0.41 (0.19, 0.62)       |
| Physical activity, MET-min/week             | 0.0001 (0.00007, 0.0002) | 0.0002 (0.0001, 0.0002) |
| Education                                   |                          |                         |
| ≤Elementary school                          |                          |                         |
| Middle school                               | 1.00 (0.36, 1.64)        | 0.94 (0.53, 1.34)       |
| High school                                 | 1.43 (0.86, 2.01)        | 1.29 (0.88, 1.69)       |
| ≥College                                    | 1.61 (1.02, 2.21)        | 1.05 (0.59, 1.50)       |
| Average monthly household income, 10000 KRW | 0.002 (0.001, 0.003)     | 0.0005 (0.00005, 0.001) |
| Occupation                                  |                          |                         |
| No                                          |                          |                         |
| Yes                                         | 0.53 (0.12, 0.93)        | 0.09 (-0.12, 0.31)      |
| Survey year                                 |                          |                         |
| 2008                                        |                          |                         |
| 2009                                        | -0.64 (-1.20, -0.072)    | -0.022 (-0.38, 0.338)   |
| 2010                                        | -1.41 (-2.02, -0.80)     | -0.84 (-1.25, -0.43)    |
| 2011                                        | -0.18 (-0.95, 0.59)      | -0.13 (-0.61, 0.34)     |

MET, Metabolic Equivalent Task; KRW, Korea Republic Won

Data are presented as beta coefficient (95% confidence interval).



---

Group 1: 25-hydroxy vitamin D < 10 ng/mL and calcium intake < 800 mg

Group 2: 25-hydroxy vitamin D  $\geq$  10 ng/mL and calcium intake < 800 mg

Group 3: 25-hydroxy vitamin D < 10 ng/mL and calcium intake  $\geq$  800 mg

Group 4: 25-hydroxy vitamin D  $\geq$  10 ng/mL and calcium intake  $\geq$  800 mg

<sup>a</sup>Multivariable model adjusted for age, body mass index status, total energy intake, water intake per body weight, smoking, alcohol drinking, physical activity, education, income, occupation, and survey year.



**Table S4.** Linear regression analysis of changes in whole body total fat-free mass by group (serum vitamin D level cutoff: 20 ng/mL, recommended daily calcium intake: 800 mg)

| Characteristics                             | Men                      | Women                   |
|---------------------------------------------|--------------------------|-------------------------|
| Age, years                                  | -0.11 (-0.13, -0.094)    | -0.032 (-0.043, -0.022) |
| Group                                       |                          |                         |
| 1 (n = 2,630/5,497)                         |                          |                         |
| 2 (n = 2,172/2,247)                         | 0.44 (0.028, 0.84)       | 0.14 (-0.11, 0.40)      |
| 3 (n = 576/588)                             | 0.53 (-0.067, 1.13)      | 0.37 (-0.05, 0.80)      |
| 4 (n = 478/256)                             | 1.68 (0.94, 2.42)        | 0.82 (0.17, 1.47)       |
| Body mass index, kg/m <sup>2</sup>          |                          |                         |
| < 25                                        |                          |                         |
| ≥ 25                                        | 6.84 (6.47, 7.20)        | 5.14 (4.86, 5.43)       |
| Nutritional intake                          |                          |                         |
| Total energy intake, kcal/day               | 0.002 (0.001, 0.002)     | 0.0009 (0.0007, 0.001)  |
| Water intake/body weight, g/kg/day          | -0.12 (-0.14, -0.10)     | -0.073 (-0.089, -0.056) |
| Smoking                                     |                          |                         |
| None                                        |                          |                         |
| Past                                        | 0.41 (-0.092, 0.91)      | 0.57 (-0.14, 1.27)      |
| Current                                     | 0.27 (-0.17, 0.71)       | -0.35 (-0.83, 0.13)     |
| Alcohol drinking                            |                          |                         |
| <1 time/month                               |                          |                         |
| ≥1 time/month                               | 0.38 (-0.001, 0.75)      | 0.43 (0.21, 0.64)       |
| Physical activity, MET-min/week             | 0.0001 (0.00006, 0.0002) | 0.0002 (0.0001, 0.0002) |
| Education                                   |                          |                         |
| ≤Elementary school                          |                          |                         |
| Middle school                               | 1.05 (0.41, 1.68)        | 0.94 (0.54, 1.35)       |
| High school                                 | 1.47 (0.89, 2.05)        | 1.29 (0.88, 1.70)       |
| ≥College                                    | 1.68 (1.09, 2.27)        | 1.05 (0.60, 1.50)       |
| Average monthly household income, 10000 KRW | 0.002 (0.001, 0.003)     | 0.0005 (0.00005, 0.001) |
| Occupation                                  |                          |                         |
| No                                          |                          |                         |
| Yes                                         | 0.55 (0.15, 0.96)        | 0.10 (-0.11, 0.32)      |
| Survey year                                 |                          |                         |
| 2008                                        |                          |                         |
| 2009                                        | -0.53 (-1.10, 0.037)     | -0.018 (-0.39, 0.351)   |
| 2010                                        | -1.33 (-1.94, -0.71)     | -0.84 (-1.26, -0.43)    |
| 2011                                        | -0.04 (-0.82, 0.74)      | -0.15 (-0.62, 0.33)     |

MET, Metabolic Equivalent Task; KRW, Korea Republic Won

Data are presented as beta coefficient (95% confidence interval).



---

Group 1: 25-hydroxy vitamin D < 20 ng/mL and calcium intake < 800 mg

Group 2: 25-hydroxy vitamin D  $\geq$  20 ng/mL and calcium intake < 800 mg

Group 3: 25-hydroxy vitamin D < 20 ng/mL and calcium intake  $\geq$  800 mg

Group 4: 25-hydroxy vitamin D  $\geq$  20 ng/mL and calcium intake  $\geq$  800 mg

<sup>a</sup>Multivariable model adjusted for age, body mass index status, total energy intake, water intake per body weight, smoking, alcohol drinking, physical activity, education, income, occupation, and survey year.





**Table S5.** Linear regression analysis of changes in whole body total fat-free mass by group (serum vitamin D level cutoff: 30 ng/mL, recommended daily calcium intake: 800 mg)

| Characteristics                             | Men                      | Women                   |
|---------------------------------------------|--------------------------|-------------------------|
| Age, years                                  | -0.11 (-0.12, -0.092)    | -0.032 (-0.043, -0.021) |
| Group                                       |                          |                         |
| 1 (n = 4,326/7,346)                         |                          |                         |
| 2 (n = 476/398)                             | 0.14 (-0.44, 0.71)       | 0.18 (-0.30, 0.66)      |
| 3 (n = 948/804)                             | 0.68 (0.19, 1.17)        | 0.42 (0.051, 0.80)      |
| 4 (n = 106/40)                              | 2.64 (1.37, 3.90)        | 1.77 (0.42, 3.12)       |
| Body mass index, kg/m <sup>2</sup>          |                          |                         |
| < 25                                        |                          |                         |
| ≥ 25                                        | 6.84 (6.47, 7.21)        | 5.15 (4.86, 5.44)       |
| Nutritional intake                          |                          |                         |
| Total energy intake, kcal/day               | 0.002 (0.001, 0.002)     | 0.0009 (0.0007, 0.001)  |
| Water intake/body weight, g/kg/day          | -0.12 (-0.14, -0.10)     | -0.072 (-0.089, -0.056) |
| Smoking                                     |                          |                         |
| None                                        |                          |                         |
| Past                                        | 0.42 (-0.079, 0.92)      | 0.57 (-0.13, 1.28)      |
| Current                                     | 0.25 (-0.19, 0.69)       | -0.37 (-0.85, 0.12)     |
| Alcohol drinking                            |                          |                         |
| <1 time/month                               |                          |                         |
| ≥1 time/month                               | 0.42 (0.038, 0.79)       | 0.43 (0.21, 0.64)       |
| Physical activity, MET-min/week             | 0.0001 (0.00007, 0.0002) | 0.0002 (0.0001, 0.0002) |
| Education                                   |                          |                         |
| ≤Elementary school                          |                          |                         |
| Middle school                               | 1.03 (0.39, 1.67)        | 0.93 (0.53, 1.34)       |
| High school                                 | 1.45 (0.86, 2.04)        | 1.28 (0.88, 1.69)       |
| ≥College                                    | 1.63 (1.02, 2.23)        | 1.04 (0.59, 1.49)       |
| Average monthly household income, 10000 KRW | 0.002 (0.001, 0.003)     | 0.0005 (0.00005, 0.001) |
| Occupation                                  |                          |                         |
| No                                          |                          |                         |
| Yes                                         | 0.57 (0.17, 0.98)        | 0.10 (-0.12, 0.32)      |
| Survey year                                 |                          |                         |
| 2008                                        |                          |                         |
| 2009                                        | -0.63 (-1.19, -0.069)    | -0.038 (-0.41, 0.330)   |
| 2010                                        | -1.43 (-2.03, -0.82)     | -0.86 (-1.28, -0.45)    |
| 2011                                        | -0.23 (-1.00, 0.55)      | -0.18 (-0.64, 0.29)     |

MET, Metabolic Equivalent Task; KRW, Korea Republic Won

Data are presented as beta coefficient (95% confidence interval).



---

Group 1: 25-hydroxy vitamin D < 30 ng/mL and calcium intake < 800 mg

Group 2: 25-hydroxy vitamin D  $\geq$  30 ng/mL and calcium intake < 800 mg

Group 3: 25-hydroxy vitamin D < 30 ng/mL and calcium intake  $\geq$  800 mg

Group 4: 25-hydroxy vitamin D  $\geq$  30 ng/mL and calcium intake  $\geq$  800 mg

<sup>a</sup>Multivariable model adjusted for age, body mass index status, total energy intake, water intake per body weight, smoking, alcohol drinking, physical activity, education, income, occupation, and survey year.



**Table S6.** Linear regression analysis of changes in whole body total fat-free mass by group (serum vitamin D level cutoff: 10 ng/mL, recommended daily calcium intake: 1000 mg)

| Characteristics                             | Men                      | Women                   |
|---------------------------------------------|--------------------------|-------------------------|
| Age, years                                  | -0.11 (-0.12, -0.092)    | -0.033 (-0.043, -0.022) |
| Group                                       |                          |                         |
| 1 (n = 222/778)                             |                          |                         |
| 2 (n = 5,122/7,397)                         | 1.62 (0.83, 2.41)        | 0.70 (0.17, 1.23)       |
| 3 (n = 23/24)                               | 1.11 (-1.31, 3.54)       | 1.47 (-0.86, 3.79)      |
| 4 (n = 489/389)                             | 3.03 (2.01, 4.04)        | 0.96 (0.33, 1.58)       |
| Body mass index, kg/m <sup>2</sup>          |                          |                         |
| < 25                                        |                          |                         |
| ≥ 25                                        | 6.82 (6.45, 7.19)        | 5.14 (4.86, 5.43)       |
| Nutritional intake                          |                          |                         |
| Total energy intake, kcal/day               | 0.002 (0.001, 0.002)     | 0.0009 (0.0007, 0.001)  |
| Water intake/body weight, g/kg/day          | -0.12 (-0.14, -0.09)     | -0.071 (-0.087, -0.055) |
| Smoking                                     |                          |                         |
| None                                        |                          |                         |
| Past                                        | 0.41 (-0.090, 0.91)      | 0.57 (-0.14, 1.28)      |
| Current                                     | 0.31 (-0.13, 0.75)       | -0.35 (-0.83, 0.14)     |
| Alcohol drinking                            |                          |                         |
| <1 time/month                               |                          |                         |
| ≥1 time/month                               | 0.39 (0.017, 0.76)       | 0.40 (0.19, 0.61)       |
| Physical activity, MET-min/week             | 0.0001 (0.00006, 0.0002) | 0.0002 (0.0001, 0.0002) |
| Education                                   |                          |                         |
| ≤Elementary school                          |                          |                         |
| Middle school                               | 1.01 (0.36, 1.65)        | 0.95 (0.55, 1.36)       |
| High school                                 | 1.44 (0.87, 2.02)        | 1.30 (0.89, 1.70)       |
| ≥College                                    | 1.64 (1.04, 2.23)        | 1.05 (0.60, 1.51)       |
| Average monthly household income, 10000 KRW | 0.002 (0.001, 0.003)     | 0.0005 (0.00004, 0.001) |
| Occupation                                  |                          |                         |
| No                                          |                          |                         |
| Yes                                         | 0.54 (0.14, 0.95)        | 0.10 (-0.12, 0.31)      |
| Survey year                                 |                          |                         |
| 2008                                        |                          |                         |
| 2009                                        | -0.63 (-1.20, -0.067)    | -0.018 (-0.38, 0.342)   |
| 2010                                        | -1.40 (-2.02, -0.79)     | -0.83 (-1.24, -0.42)    |
| 2011                                        | -0.18 (-0.95, 0.58)      | -0.13 (-0.60, 0.34)     |

MET, Metabolic Equivalent Task; KRW, Korea Republic Won

Data are presented as beta coefficient (95% confidence interval).



---

Group 1: 25-hydroxy vitamin D < 10 ng/mL and calcium intake < 1000 mg

Group 2: 25-hydroxy vitamin D  $\geq$  10 ng/mL and calcium intake < 1000 mg

Group 3: 25-hydroxy vitamin D < 10 ng/mL and calcium intake  $\geq$  1000 mg

Group 4: 25-hydroxy vitamin D  $\geq$  10 ng/mL and calcium intake  $\geq$  1000 mg

<sup>a</sup>Multivariable model adjusted for age, body mass index status, total energy intake, water intake per body weight, smoking, alcohol drinking, physical activity, education, income, occupation, and survey year.



**Table S7.** Linear regression analysis of changes in whole body total fat-free mass by group (serum vitamin D level cutoff: 20 ng/mL, recommended daily calcium intake: 1000 mg)

| Characteristics                             | Men                      | Women                   |
|---------------------------------------------|--------------------------|-------------------------|
| Age, years                                  | -0.11 (-0.13, -0.094)    | -0.032 (-0.043, -0.021) |
| Group                                       |                          |                         |
| 1 (n = 2,936/5,801)                         |                          |                         |
| 2 (n = 2,408/2,374)                         | 0.45 (0.060, 0.84)       | 0.17 (-0.08, 0.42)      |
| 3 (n = 270/284)                             | 0.83 (0.041, 1.62)       | 0.31 (-0.19, 0.80)      |
| 4 (n = 242/129)                             | 2.50 (1.57, 3.44)        | 0.60 (-0.18, 1.38)      |
| Body mass index, kg/m <sup>2</sup>          |                          |                         |
| < 25                                        |                          |                         |
| ≥ 25                                        | 6.83 (6.46, 7.19)        | 5.15 (4.86, 5.43)       |
| Nutritional intake                          |                          |                         |
| Total energy intake, kcal/day               | 0.002 (0.001, 0.002)     | 0.0009 (0.0007, 0.001)  |
| Water intake/body weight, g/kg/day          | -0.12 (-0.14, -0.10)     | -0.071 (-0.087, -0.055) |
| Smoking                                     |                          |                         |
| None                                        |                          |                         |
| Past                                        | 0.40 (-0.095, 0.90)      | 0.57 (-0.13, 1.28)      |
| Current                                     | 0.27 (-0.17, 0.71)       | -0.35 (-0.83, 0.13)     |
| Alcohol drinking                            |                          |                         |
| <1 time/month                               |                          |                         |
| ≥1 time/month                               | 0.38 (0.001, 0.75)       | 0.42 (0.20, 0.63)       |
| Physical activity, MET-min/week             | 0.0001 (0.00006, 0.0002) | 0.0002 (0.0001, 0.0002) |
| Education                                   |                          |                         |
| ≤Elementary school                          |                          |                         |
| Middle school                               | 1.06 (0.43, 1.70)        | 0.95 (0.55, 1.36)       |
| High school                                 | 1.49 (0.91, 2.07)        | 1.30 (0.89, 1.71)       |
| ≥College                                    | 1.71 (1.12, 2.29)        | 1.06 (0.60, 1.51)       |
| Average monthly household income, 10000 KRW | 0.002 (0.001, 0.003)     | 0.0005 (0.00004, 0.001) |
| Occupation                                  |                          |                         |
| No                                          |                          |                         |
| Yes                                         | 0.56 (0.16, 0.96)        | 0.10 (-0.12, 0.32)      |
| Survey year                                 |                          |                         |
| 2008                                        |                          |                         |
| 2009                                        | -0.53 (-1.10, 0.037)     | -0.014 (-0.38, 0.356)   |
| 2010                                        | -1.33 (-1.94, -0.71)     | -0.83 (-1.25, -0.42)    |
| 2011                                        | -0.06 (-0.84, 0.72)      | -0.13 (-0.61, 0.34)     |

MET, Metabolic Equivalent Task; KRW, Korea Republic Won

Data are presented as beta coefficient (95% confidence interval).



---

Group 1: 25-hydroxy vitamin D < 20 ng/mL and calcium intake < 1000 mg

Group 2: 25-hydroxy vitamin D  $\geq$  20 ng/mL and calcium intake < 1000 mg

Group 3: 25-hydroxy vitamin D < 20 ng/mL and calcium intake  $\geq$  1000 mg

Group 4: 25-hydroxy vitamin D  $\geq$  20 ng/mL and calcium intake  $\geq$  1000 mg

<sup>a</sup>Multivariable model adjusted for age, body mass index status, total energy intake, water intake per body weight, smoking, alcohol drinking, physical activity, education, income, occupation, and survey year.

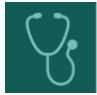

**Table S8.** Linear regression analysis of changes in whole body total fat-free mass by group (serum vitamin D level cutoff: 30 ng/mL, recommended daily calcium intake: 1000 mg)

| Characteristics                             | Men                      | Women                   |
|---------------------------------------------|--------------------------|-------------------------|
| Age, years                                  | -0.11 (-0.12, -0.091)    | -0.032 (-0.043, -0.021) |
| Group                                       |                          |                         |
| 1 (n = 4,820/7,760)                         |                          |                         |
| 2 (n = 524/415)                             | 0.44 (-0.15, 1.03)       | 0.24 (-0.23, 0.70)      |
| 3 (n = 454/390)                             | 1.33 (0.69, 1.98)        | 0.31 (-0.12, 0.74)      |
| 4 (n = 58/23)                               | 1.88 (0.48, 3.28)        | 1.27 (-0.71, 3.25)      |
| Body mass index, kg/m <sup>2</sup>          |                          |                         |
| < 25                                        |                          |                         |
| ≥ 25                                        | 6.84 (6.47, 7.21)        | 5.15 (4.87, 5.44)       |
| Nutritional intake                          |                          |                         |
| Total energy intake, kcal/day               | 0.002 (0.001, 0.002)     | 0.0009 (0.0007, 0.001)  |
| Water intake/body weight, g/kg/day          | -0.12 (-0.14, -0.09)     | -0.070 (-0.086, -0.054) |
| Smoking                                     |                          |                         |
| None                                        |                          |                         |
| Past                                        | 0.41 (-0.089, 0.91)      | 0.58 (-0.13, 1.28)      |
| Current                                     | 0.25 (-0.18, 0.69)       | -0.36 (-0.84, 0.12)     |
| Alcohol drinking                            |                          |                         |
| <1 time/month                               |                          |                         |
| ≥1 time/month                               | 0.40 (0.030, 0.78)       | 0.41 (0.20, 0.63)       |
| Physical activity, MET-min/week             | 0.0001 (0.00006, 0.0002) | 0.0002 (0.0001, 0.0002) |
| Education                                   |                          |                         |
| ≤Elementary school                          |                          |                         |
| Middle school                               | 1.03 (0.38, 1.67)        | 0.94 (0.54, 1.35)       |
| High school                                 | 1.46 (0.87, 2.05)        | 1.29 (0.88, 1.70)       |
| ≥College                                    | 1.65 (1.05, 2.25)        | 1.05 (0.59, 1.50)       |
| Average monthly household income, 10000 KRW | 0.002 (0.001, 0.003)     | 0.0005 (0.00004, 0.001) |
| Occupation                                  |                          |                         |
| No                                          |                          |                         |
| Yes                                         | 0.58 (0.18, 0.99)        | 0.10 (-0.12, 0.32)      |
| Survey year                                 |                          |                         |
| 2008                                        |                          |                         |
| 2009                                        | -0.62 (-1.18, -0.053)    | -0.035 (-0.40, 0.333)   |
| 2010                                        | -1.41 (-2.02, -0.80)     | -0.86 (-1.27, -0.44)    |
| 2011                                        | -0.22 (-1.00, 0.55)      | -0.17 (-0.63, 0.30)     |

MET, Metabolic Equivalent Task; KRW, Korea Republic Won

Data are presented as beta coefficient (95% confidence interval).

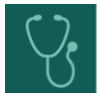

---

Group 1: 25-hydroxy vitamin D < 30 ng/mL and calcium intake < 1000 mg

Group 2: 25-hydroxy vitamin D  $\geq$  30 ng/mL and calcium intake < 1000 mg

Group 3: 25-hydroxy vitamin D < 30 ng/mL and calcium intake  $\geq$  1000 mg

Group 4: 25-hydroxy vitamin D  $\geq$  30 ng/mL and calcium intake  $\geq$  1000 mg

<sup>a</sup>Multivariable model adjusted for age, body mass index status, total energy intake, water intake per body weight, smoking, alcohol drinking, physical activity, education, income, occupation, and survey year.



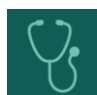**Table S9.** Linear regression analysis of changes in whole body total fat-free mass according to serum vitamin D level and daily calcium intake

| Characteristics                             | Men                      | Women                   |
|---------------------------------------------|--------------------------|-------------------------|
| Age, years                                  | -0.11 (-0.13, -0.10)     | -0.034 (-0.044, -0.023) |
| 25-hydroxy vitamin D, ng/mL                 | 0.061 (0.035, 0.086)     | 0.023 (0.003, 0.043)    |
| Calcium intake, g                           | 1.13 (0.59, 1.68)        | 0.62 (0.067, 1.16)      |
| Body mass index, kg/m <sup>2</sup>          |                          |                         |
| < 25                                        |                          |                         |
| ≥ 25                                        | 6.83 (6.46, 7.20)        | 5.14 (4.85, 5.42)       |
| Nutritional intake                          |                          |                         |
| Total energy intake, kcal/day               | 0.001 (0.001, 0.002)     | 0.0009 (0.0006, 0.001)  |
| Water intake/body weight, g/kg/day          | -0.12 (-0.15, -0.10)     | -0.076 (-0.093, -0.058) |
| Smoking                                     |                          |                         |
| None                                        |                          |                         |
| Past                                        | 0.39 (-0.11, 0.89)       | 0.57 (-0.14, 1.27)      |
| Current                                     | 0.29 (-0.15, 0.74)       | -0.33 (-0.81, 0.16)     |
| Alcohol drinking                            |                          |                         |
| <1 time/month                               |                          |                         |
| ≥1 time/month                               | 0.37 (-0.006, 0.75)      | 0.42 (0.20, 0.63)       |
| Physical activity, MET-min/week             | 0.0001 (0.00005, 0.0002) | 0.0002 (0.0001, 0.0002) |
| Education                                   |                          |                         |
| ≤Elementary school                          |                          |                         |
| Middle school                               | 1.04 (0.39, 1.68)        | 0.92 (0.52, 1.33)       |
| High school                                 | 1.49 (0.91, 2.07)        | 1.28 (0.87, 1.69)       |
| ≥College                                    | 1.70 (1.11, 2.29)        | 1.04 (0.58, 1.49)       |
| Average monthly household income, 10000 KRW | 0.002 (0.001, 0.003)     | 0.0005 (0.00005, 0.001) |
| Occupation                                  |                          |                         |
| No                                          |                          |                         |
| Yes                                         | 0.49 (0.080, 0.89)       | 0.11 (-0.11, 0.32)      |
| Survey year                                 |                          |                         |
| 2008                                        |                          |                         |
| 2009                                        | -0.43 (-0.99, 0.132)     | 0.024 (-0.34, 0.39)     |
| 2010                                        | -1.21 (-1.82, -0.59)     | -0.80 (-1.22, -0.39)    |
| 2011                                        | 0.12 (-0.67, 0.90)       | -0.07 (-0.55, 0.40)     |

MET, Metabolic Equivalent Task; KRW, Korea Republic Won

Data are presented as beta coefficient (95% confidence interval).

<sup>a</sup>Multivariable model adjusted for age, body mass index status, total energy intake, water intake per body weight, smoking, alcohol drinking, physical activity, education, income, occupation, and survey year.
